# Supplementary figures and images for: Human cytomegalovirus infection coopts chromatin organization to diminish TEAD1 transcription factor activity
Source: eLife journal article supplement (doi:10.7554/elife.101578), 2024-11-27

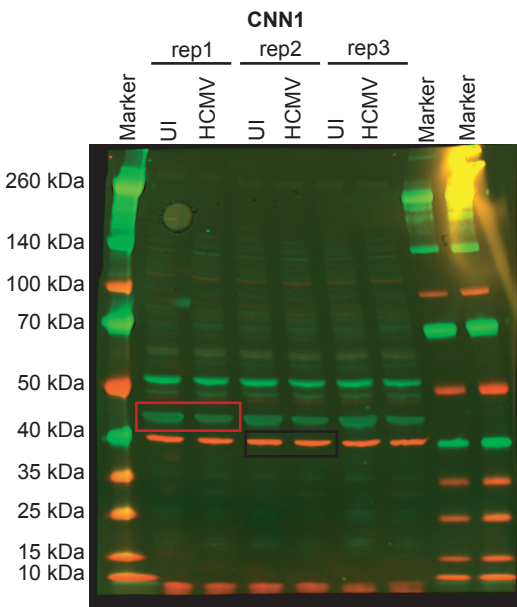

GAPDH

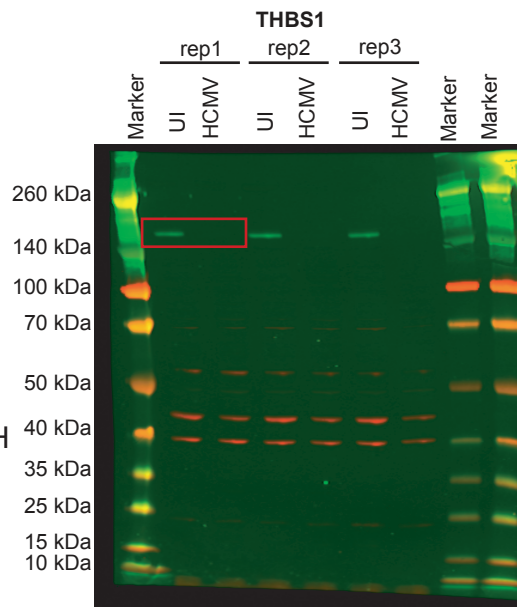

Supplement: fig5-data2 [file elife-101578-fig5-data2-v1.zip]

**Figure 6-figure supplement 1:** Western blots of uninfected and HCMV infected fibroblasts

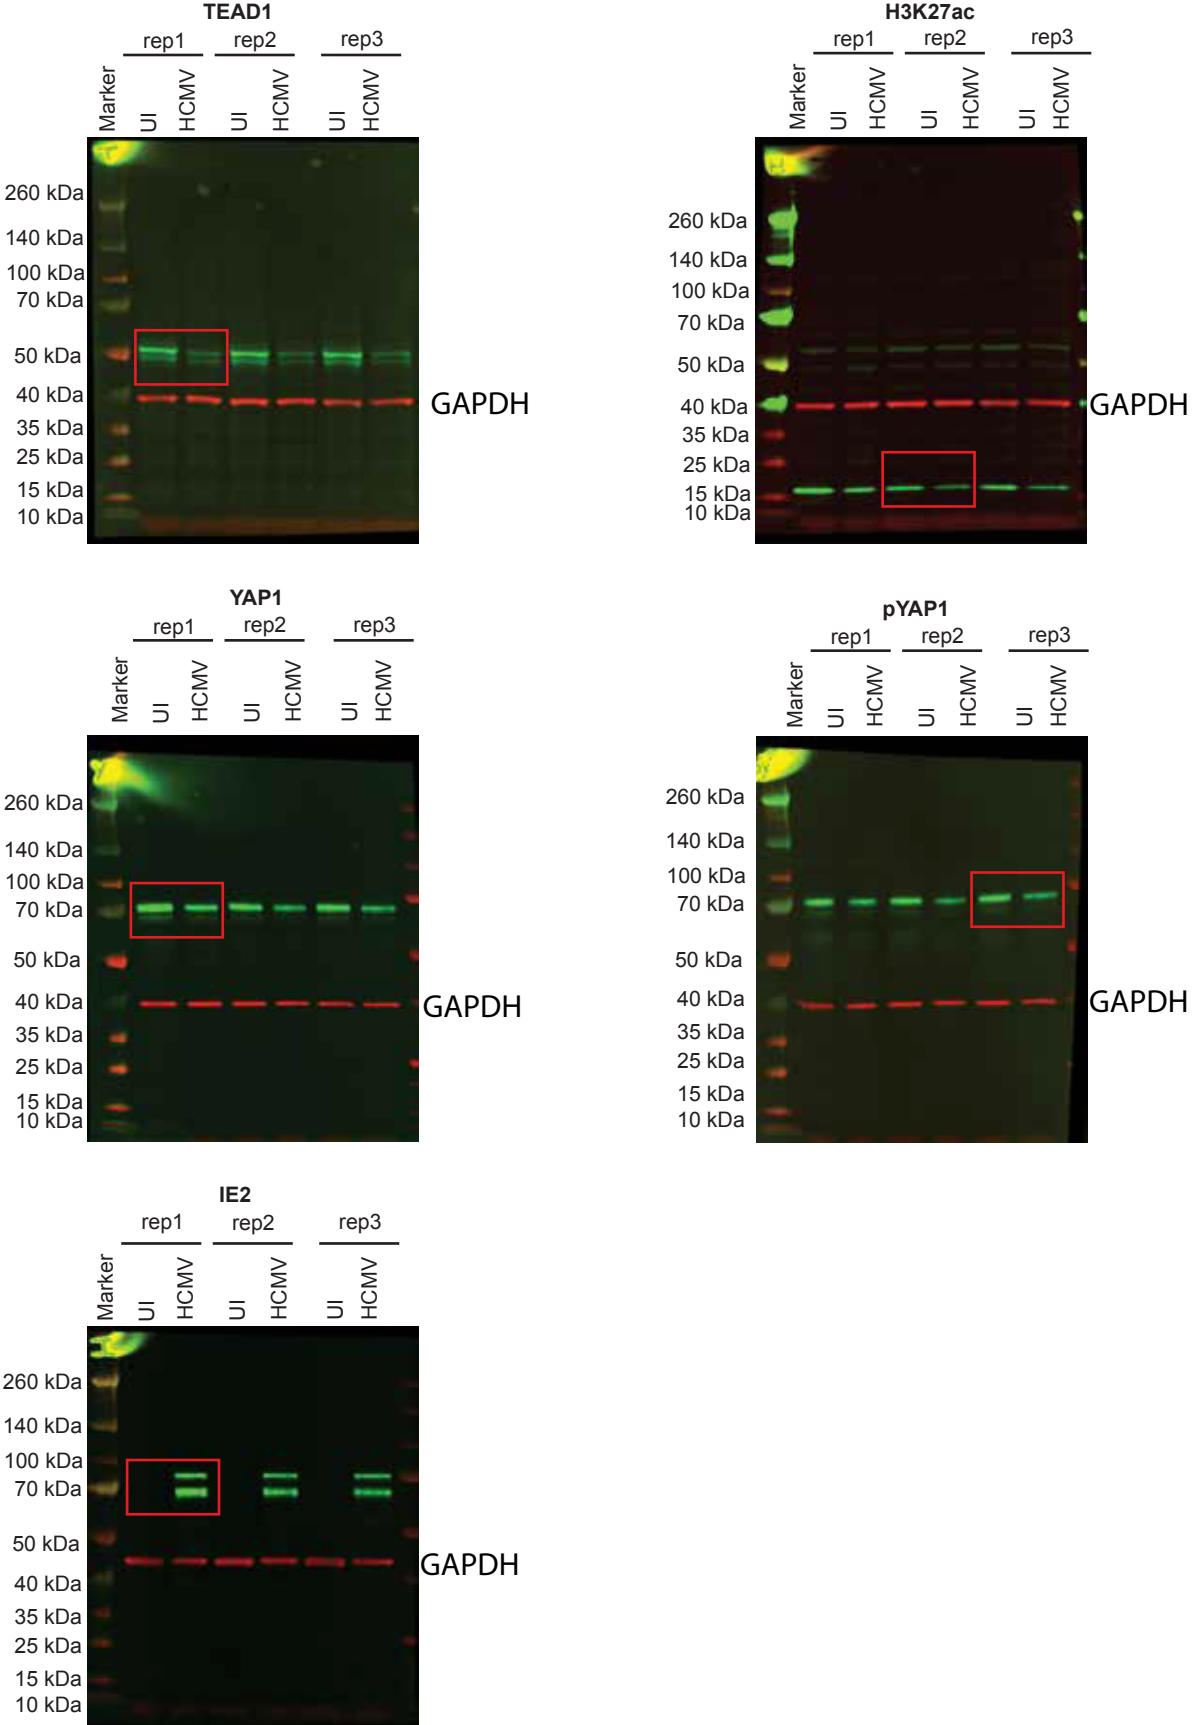

Supplement: fig6-data2 [file elife-101578-fig6-data2-v1.zip]

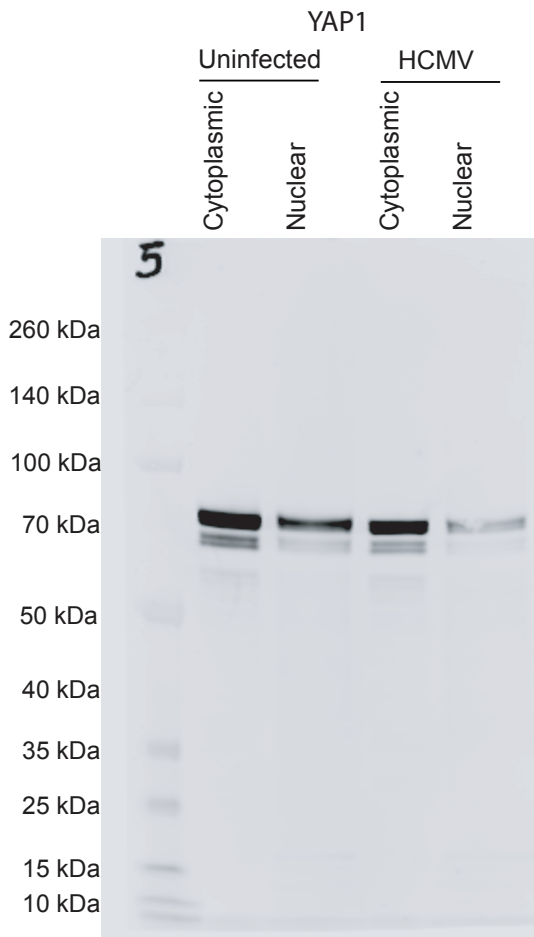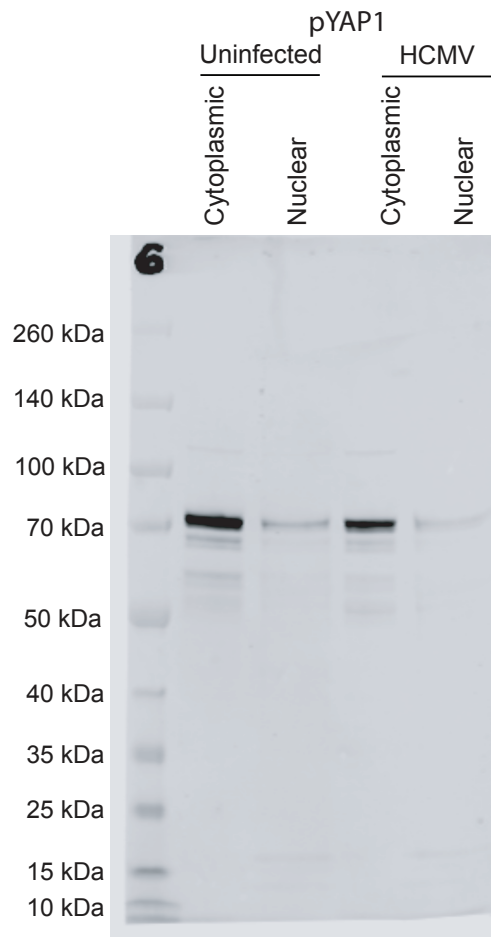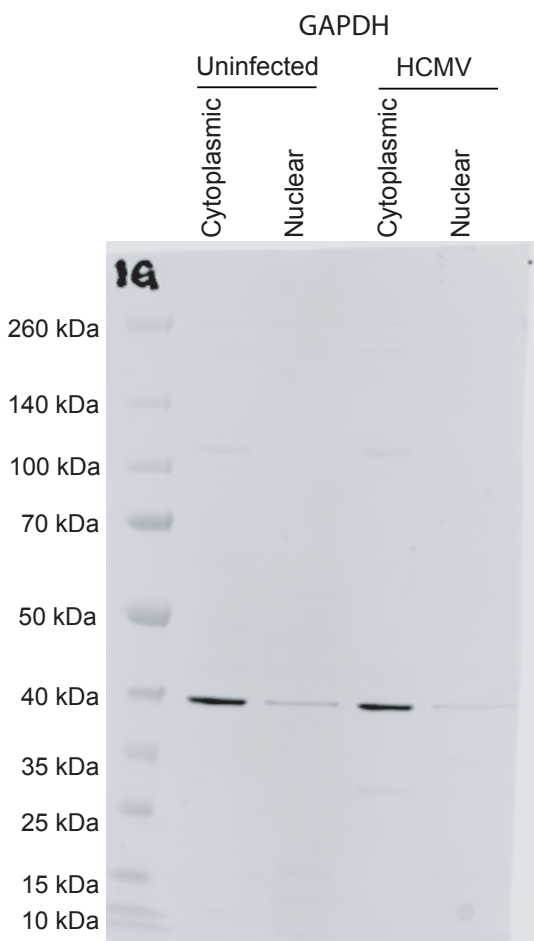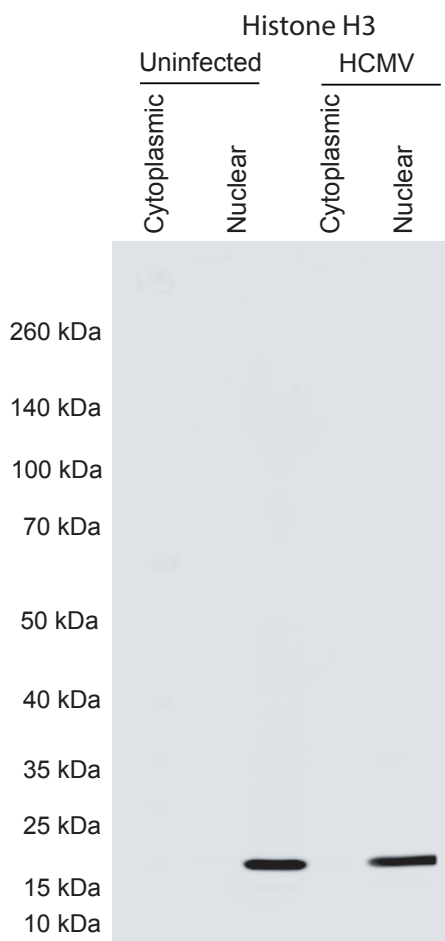

Supplement: fig6-data2 [file elife-101578-fig6-data2-v1.zip]

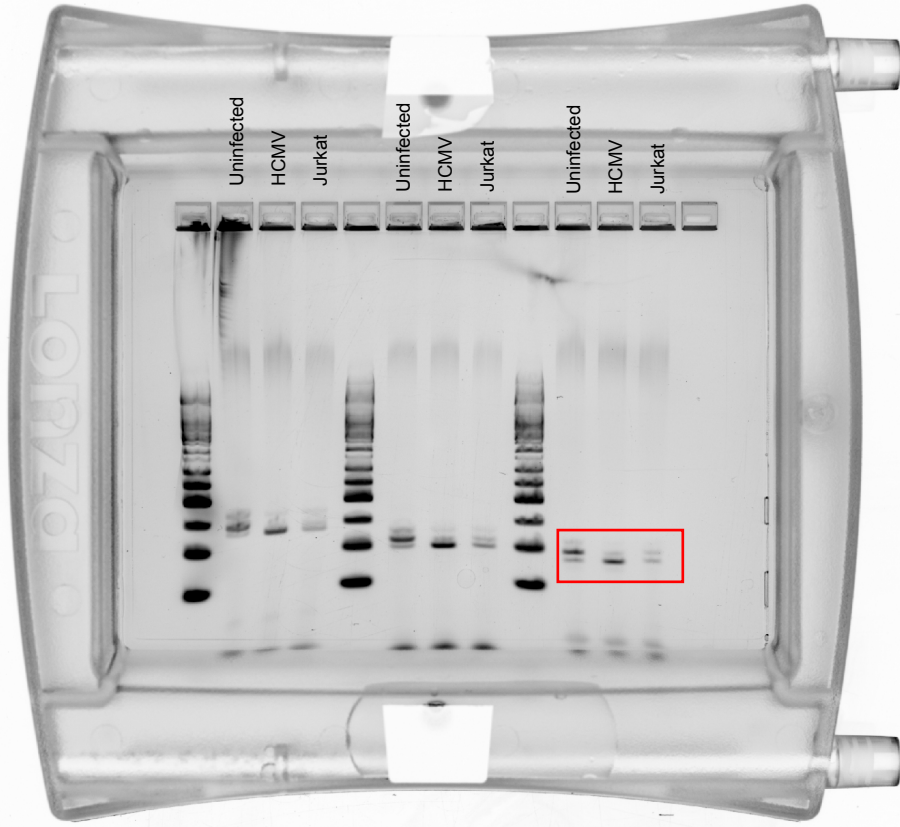

Supplement: fig6-data2 [file elife-101578-fig6-data2-v1.zip]
